# Supplementary material for: The diagnostic values of circulating miRNAs for hypertension and bioinformatics analysis
Source: PubMed Central journal article supplement (PMC6147777; doi:10.1042/bsr20180525), 2018-08-29
Supplement: bsr20180525_Supp1.pdf [file bsr20180525_Supp1.pdf]

Supplemental Table 1. Levels of delta ct of microRNAs between normal group and hypertension group

| MicroRNAs   | Delta ct of microRNAs |                      | P-value |
|-------------|-----------------------|----------------------|---------|
|             | Normal group          | Hypertension group   |         |
| miR-1-5p    | 0.00±2.65             | 0.78±2.90            | 0.949   |
| miR-133a-3p | 0.00±3.15             | 1.30±3.84            | 0.142   |
| miR-23a-5p  | -0.34 (-1.59-1.53)    | 1.44 (-0.45-2.65)    | 0.009   |
| miR-199a-3p | -0.15 (-0.87-0.79)    | 1.02 (0.45-2.41)     | <0.001  |
| miR-20b-3p  | 0.00±-0.97            | 3.14±3.56            | 0.777   |
| miR-155b-5p | -0.15 (-1.34-1.15)    | 1.01 (-0.05-1.66)    | 0.005   |
| miR-195-5p  | -0.24 (-0.80-0.59)    | 0.15 (-0.44-0.95)    | 0.062   |
| miR-21-5p   | -0.22 (-0.77-0.68)    | 0.86 (-0.013-1.562)  | <0.001  |
| miR-320a    | 0.38 (-1.01-1.26)     | 0.51 (-0.67-1.38)    | 0.206   |
| miR-1-3p    | 0.00±2.37             | 1.66±3.34            | 0.100   |
| miR-208a-3p | 0.00±2.43             | 1.84±3.36            | 0.375   |
| miR-423-5p  | -0.04 (-1.05-1.07)    | 1.68 (0.53-2.67)     | <0.001  |
| miR-106b-5p | -0.77 (-0.97-0.70)    | -0.85 (-1.47-0.00)   | 0.024   |
| miR-21-3p   | 0.00±2.31             | 0.50±2.93            | 0.242   |
| miR-23a-3p  | 0.18 (-1.35-1.77)     | 1.15 (0.28-1.85)     | 0.006   |
| miR-126-5p  | -0.20 (-0.98-1.01)    | 0.85 (-0.06-1.40)    | 0.001   |
| miR-133b    | 0.00±4.04             | 0.75±2.42            | 0.001   |
| miR-675-3p  | 0.12 (-1.05-1.12)     | -1.14 (-2.43- -0.21) | 0.001   |
| miR-223-3p  | -0.15 (-1.59-1.13)    | -1.11 (-2.81—0.53)   | <0.001  |
| Let-7i-5p   | 0.13 (-1.68-1.28)     | 1.47 (-1.17-2.25)    | 0.104   |
| miR-208b    | 0.00±2.91             | -0.03±3.10           | 0.588   |
| miR-19b-3p  | -0.20 (-1.06-1.12)    | -0.89 (-1.66 -0.089) | 0.052   |
| miR-122-5p  | -0.04 (-1.44-1.31)    | 2.61 (0.57-3.79)     | <0.001  |
| miR-18b-5p  | 0.00±3.97             | -2.19±3.65           | 0.235   |
| miR-20b-5p  | 0.69 (-1.45-2.35)     | -1.02 (-3.64-0.03)   | <0.001  |
| miR-548c-3p | 0.00±6.10             | -2.83±4.93           | 0.061   |
| miR-499a-5p | 0.00±5.59             | -2.97±5.69           | 0.803   |
